# Supplementary material for: State of the art of chronic spontaneous urticaria in Italy: a multicentre survey to evaluate physicians’ and patients’ perspectives
Source: PubMed Central journal article supplement — BMJ Open. 2016 Oct 14;6(10):e012378. doi: 10.1136/bmjopen-2016-012378 (PMC5073619; doi:10.1136/bmjopen-2016-012378), 2016-10-14
Supplement: bmjopen-2016-012378supp_file4.pdf [file bmjopen-2016-012378supp_file4.pdf]

Complete Patient Diaries for the last **5 CSU patients you have assessed who are being treated for the condition** (regardless of the type of treatment). Please consider treated CSU patients only and omit patients who are not receiving any pharmacological therapy.

**THE PATIENT**

1. Sex: M F      2. Age: |\_\_|\_\_|      3. Year of onset of first symptoms: |\_\_|\_\_|\_\_|\_\_|

**THE DIAGNOSIS**

4. Did the patient refer to you directly when he/she developed the first symptoms or only after going to see other physicians or the emergency department?

- directly when he/she developed the first symptoms
- after going to the emergency department
- after seeing a GP
- after seeing another specialist → specify which specialist \_\_\_\_\_
- don't know / don't remember

5. What assessments/tests did you prescribe when the patient first presented to you with the symptoms?  test1  test2  test3  test4  test5  test 6 ....

6. Do you remember what symptoms the patient had?  No  Yes \_\_\_\_\_ -

7. Did this patient receive a diagnosis of CSU from you or from another physician?  you  GP  another dermatologist  another allergologist  
 at the emergency dept.  another specialist → if another specialist \_\_\_\_\_ please specify  
\_\_\_\_\_

8. How long after symptom onset did it take for the diagnosis of CSU to be reached? |\_\_|\_\_| months / |\_\_|\_\_| years

9. In this patient, do the symptoms of CSU re-appear with a certain frequency and regularity?

- They re-appear frequently and with a certain regularity
- They re-appear frequently but with no regularity
- They don't re-appear frequently but they have a certain regularity
- They don't re-appear frequently and they don't have regularity

9.A How often do the symptoms re-appear? \_\_\_\_\_open \_\_\_\_\_

**CURRENT THERAPY**

**10. Current therapy:**

- only H1-antihistamine (standard dose)
- only H1-antihistamine (increased-dose)
- H1-antihistamine in combination with H2-antihistamine
- H1-antihistamine in combination with leukotriene antagonist
- H1-antihistamine in combination with leukotriene antagonist /H2-antihistamine
- steroids (alone or in combination with other drugs)
- systemic calcineurin inhibitors (cyclosporine)
- another drug / drug combination

**11. Date when current treatment was started** |\_|\_|\_|\_| / |\_|\_|

**12.A The patient's treatment is ...**  a chronic treatment  an "as needed" treatment (PRN) (the patient takes it when the symptoms occur)

**12.B Is the patient refractory to his/her current pharmacological treatment? In other words, does the patient continue to have symptoms despite taking the medications?**

- Yes  No

**13. In the past, was the patient given other treatments for CSU?**

- No, no other treatment previously (neither topical nor systemic)
- Yes, but only topical treatments previously
- Yes, other systemic treatments (oral or by injection) previously

If other pharmacological treatments (oral or by injection) previously

**14. What other treatments was the patient given? Please indicate according to the sequence with which they were prescribed and provide the reasons why the treatments were discontinued.**

|                    | Indicate treatment                                                                                    | Indicate the reasons why it was discontinued                                                                                                                                                                                                                                           |
|--------------------|-------------------------------------------------------------------------------------------------------|----------------------------------------------------------------------------------------------------------------------------------------------------------------------------------------------------------------------------------------------------------------------------------------|
| <b>Treatment 1</b> | <input type="checkbox"/> only H1-antihistamine (standard dose)                                        | <input type="checkbox"/> tolerability<br><input type="checkbox"/> inadequate efficacy<br><input type="checkbox"/> on patient's request<br><input type="checkbox"/> poor compliance<br><input type="checkbox"/> to improve patient's QoL<br><input type="checkbox"/> other reason _____ |
|                    | <input type="checkbox"/> only H1-antihistamine (increased-dose)                                       |                                                                                                                                                                                                                                                                                        |
|                    | <input type="checkbox"/> H1-antihistamine in combination with H2-antihistamine                        |                                                                                                                                                                                                                                                                                        |
|                    | <input type="checkbox"/> H1-antihistamine in combination with leukotriene antagonist                  |                                                                                                                                                                                                                                                                                        |
|                    | <input type="checkbox"/> H1-antihistamine in combination with leukotriene antagonist/H2-antihistamine |                                                                                                                                                                                                                                                                                        |
|                    | <input type="checkbox"/> steroids (alone or in combination with other drugs)                          |                                                                                                                                                                                                                                                                                        |
|                    | <input type="checkbox"/> systemic calcineurin inhibitors (cyclosporine)                               |                                                                                                                                                                                                                                                                                        |
|                    | <input type="checkbox"/> another drug / drug combination                                              |                                                                                                                                                                                                                                                                                        |
| <b>Treatment 2</b> | <b>Indicate treatment</b>                                                                             | <b>Indicate the reasons why it was discontinued</b>                                                                                                                                                                                                                                    |
|                    | <input type="checkbox"/> only H1-antihistamine (standard dose)                                        | <input type="checkbox"/> tolerability                                                                                                                                                                                                                                                  |

|                                                          |                                                                                                                                                                                                                                                                                                                                                                                                                                                                                                                                                                           |                                                                                                                                                                                                                                               |
|----------------------------------------------------------|---------------------------------------------------------------------------------------------------------------------------------------------------------------------------------------------------------------------------------------------------------------------------------------------------------------------------------------------------------------------------------------------------------------------------------------------------------------------------------------------------------------------------------------------------------------------------|-----------------------------------------------------------------------------------------------------------------------------------------------------------------------------------------------------------------------------------------------|
|                                                          | <input type="checkbox"/> only H1-antihistamine (increased-dose)<br><input type="checkbox"/> H1-antihistamine in combination with H2-antihistamine<br><input type="checkbox"/> H1-antihistamine in combination with leukotriene antagonist<br><input type="checkbox"/> H1-antihistamine in combination with leukotriene antagonist/H2-antihistamine<br><input type="checkbox"/> steroids (alone or in combination with other drugs)<br><input type="checkbox"/> systemic calcineurin inhibitors (cyclosporine)<br><input type="checkbox"/> another drug / drug combination | <input type="checkbox"/> inadequate efficacy<br><input type="checkbox"/> on patient's request<br><input type="checkbox"/> poor compliance<br><input type="checkbox"/> to improve patient's QoL<br><input type="checkbox"/> other reason _____ |
| <b>Treatment 3</b>                                       | <b>Indicate treatment</b>                                                                                                                                                                                                                                                                                                                                                                                                                                                                                                                                                 | <b>Indicate the reasons why it was discontinued</b>                                                                                                                                                                                           |
|                                                          | <input type="checkbox"/> only H1-antihistamine (standard dose)                                                                                                                                                                                                                                                                                                                                                                                                                                                                                                            | <input type="checkbox"/> tolerability                                                                                                                                                                                                         |
|                                                          | <input type="checkbox"/> only H1-antihistamine (increased-dose)                                                                                                                                                                                                                                                                                                                                                                                                                                                                                                           | <input type="checkbox"/> inadequate efficacy                                                                                                                                                                                                  |
|                                                          | <input type="checkbox"/> H1-antihistamine in combination with H2-antihistamine                                                                                                                                                                                                                                                                                                                                                                                                                                                                                            | <input type="checkbox"/> on patient's request                                                                                                                                                                                                 |
|                                                          | <input type="checkbox"/> H1-antihistamine in combination with leukotriene antagonist                                                                                                                                                                                                                                                                                                                                                                                                                                                                                      | <input type="checkbox"/> poor compliance                                                                                                                                                                                                      |
|                                                          | <input type="checkbox"/> H1-antihistamine in combination with leukotriene antagonist/H2-antihistamine                                                                                                                                                                                                                                                                                                                                                                                                                                                                     | <input type="checkbox"/> to improve patient's QoL                                                                                                                                                                                             |
|                                                          | <input type="checkbox"/> steroids (alone or in combination with other drugs)                                                                                                                                                                                                                                                                                                                                                                                                                                                                                              | <input type="checkbox"/> other reason _____                                                                                                                                                                                                   |
|                                                          | <input type="checkbox"/> systemic calcineurin inhibitors (cyclosporine)                                                                                                                                                                                                                                                                                                                                                                                                                                                                                                   |                                                                                                                                                                                                                                               |
| <input type="checkbox"/> another drug / drug combination |                                                                                                                                                                                                                                                                                                                                                                                                                                                                                                                                                                           |                                                                                                                                                                                                                                               |

If the patient is currently receiving treatment & this is the first treatment he/she has been given (Q. 13= NO or YES but only topical treatments previously)

**15. What reason led you to start this specific treatment consisting of "activate items indicated in Q.10"?** \_\_\_\_\_

If the patient is currently receiving treatment & he/she was given other pharmacological treatments previously (Q. 13=other systemic treatments (oral or by injection) previously)

**16. What reason led you to start this specific treatment consisting of "activate items indicated in Q.10"?** \_\_\_\_\_

**TO ALL**

**17. How often do you see this patient?**  every month  every 2/3 months  every 4/5 months  every 6/7 months  once a year  less frequently

**18. If you were asked to express an evaluation of the level of severity of CSU in this patient, what would your evaluation be?**

definitely severe  severe  quite severe  quite mild  mild  definitely mild

**19. What parameters (both clinical and non-clinical), what aspects of the condition did you consider when expressing this evaluation? Please briefly describe the rationale you followed to evaluate the level of CSU severity** \_\_\_\_\_

**20. Would this patient be eligible for treatment with the new drug presented to you during completion of the survey?**

Yes  No

→ 20.A Why? \_\_\_\_\_

----- THE END – GO ON TO COMPLETE A PATIENT DIARY FOR YOUR NEXT PATIENT -----
